# Supplementary material for: Solid-state circularly polarised luminescence of atropisomeric fluorophores embedded in achiral myo-inositol-containing polyurethanes
Source: Royal Society of Chemistry journal article supplement (doi:10.1039/c4ob02553a), 2015-01-01
Supplement: c4ob02553a1.pdf [file c4ob02553a1.pdf]

Electronic Supporting Information for

## Solid-state Circularly Polarised Luminescence of Atropisomeric Fluorophores Embedded in Achiral *myo*-Inositol-containing Polyurethanes

Tomoyuki Amako,<sup>a</sup> Kazuki Nakabayashi,<sup>a</sup> Atsushi Sudo,<sup>a</sup> Michiya Fujiki,<sup>\*b</sup> and Yoshitane Imai<sup>\*a</sup>

<sup>a</sup> Department of Applied Chemistry, Faculty of Science and Engineering, Kinki University, 3-4-1 Kowakae, Higashi-Osaka, Osaka 577-8502, Japan. (Y.I.) [y-imai@apch.kindai.ac.jp](mailto:y-imai@apch.kindai.ac.jp).

<sup>b</sup> Graduate School of Materials Science, Nara Institute of Science and Technology, 8916-5 Takayama, Ikoma, Nara 630-0192, Japan. (M.F.) [fujikim@ms.naist.jp](mailto:fujikim@ms.naist.jp).

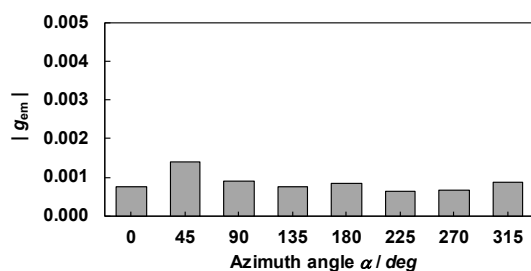

Fig. S1  $|g_{em}|$  values for **1a/2a** at different rotation angles.

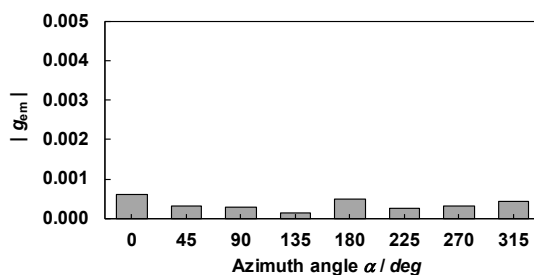

Fig. S2  $|g_{em}|$  values for **1a/2b** at different rotation angles.

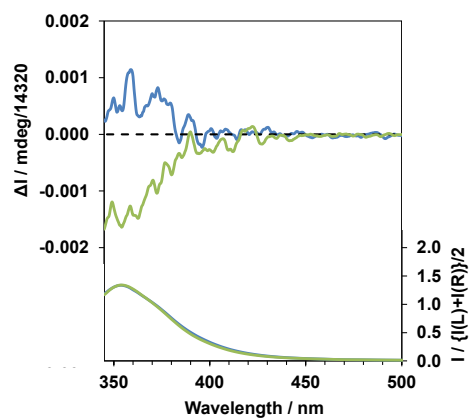

Fig. S3 CPL (upper panel) and PL (lower panel) spectra of (*R*)-**1b**/PMMA (blue lines) and (*S*)-**1b**/PMMA (green lines).

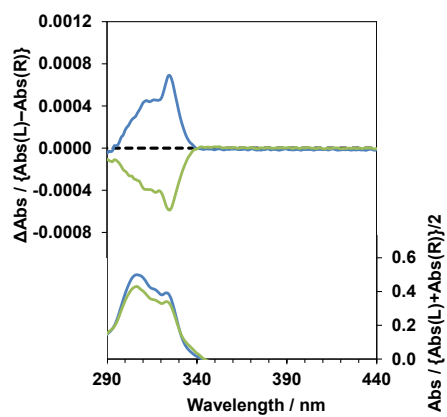

Fig. S4 CD (upper panel) and UV-vis (lower panel) spectra of (*R*)-**1b**/PMMA (blue lines) and (*S*)-**1b**/PMMA (green lines).
